# Supplementary material for: A Polymorphism within the Vitamin D Transporter Gene Predicts Outcome in Metastatic Colorectal Cancer Patients Treated with FOLFIRI/Bevacizumab or FOLFIRI/Cetuximab
Source: Oxford University Press journal article supplement (doi:10.1158/1078-0432.ccr-17-1663), 2017-12-05
Supplement: 10780432ccr171663-sup-184637_3_supp_4403425_dzqd16.docx [file 10780432ccr171663-sup-184637_3_supp_4403425_dzqd16.docx]

**Supplementary Table 4.** Associations between GC rs4588 and clinical/molecular variables

| Variable | C/C | |  | A/C | |  | A/A | | *P* value |
| --- | --- | --- | --- | --- | --- | --- | --- | --- | --- |
|  | *n* | % |  | *n* | % |  | *n* | % |  |
| **Age, median (range)** |  |  |  |  |  |  |  |  |  |
| FIRE-3 Folfiri Bev | 65 (31-75) | |  | 63 (42-76) | |  | 65 (33-76) | | P=0.66 |
| TRIBE Folfiri Bev | 59 (29-75) | |  | 60 (38-74) | |  | 64 (46-72) | | P=0.62 |
| FIRE-3 Folfiri Cet | 69 (38-79) | |  | 64 (41-75) | |  | 59 (42-75) | | P=0.11 |
| **Sex** |  |  |  |  |  |  |  |  |  |
| *FIRE-3 Folfiri Bev* |  |  |  |  |  |  |  |  | P=0.72 |
| male | 100 | 53 |  | 73 | 39 |  | 14 | 7 |  |
| female | 49 | 49 |  | 44 | 44 |  | 7 | 7 |  |
| *TRIBE Folfiri Bev* |  |  |  |  |  |  |  |  | P=0.76 |
| male | 78 | 57 |  | 51 | 37 |  | 9 | 7 |  |
| female | 46 | 52 |  | 36 | 40 |  | 7 | 8 |  |
| *FIRE-3 Folfiri Cet* |  |  |  |  |  |  |  |  | P=0.76 |
| male | 89 | 47 |  | 81 | 43 |  | 18 | 10 |  |
| female | 39 | 43 |  | 43 | 48 |  | 8 | 9 |  |
| **Primary tumor location** |  |  |  |  |  |  |  |  |  |
| *FIRE-3 Folfiri Bev* |  |  |  |  |  |  |  |  | P=0.61 |
| left | 105 | 51 |  | 88 | 43 |  | 13 | 6 |  |
| right | 41 | 55 |  | 27 | 36 |  | 6 | 8 |  |
| *TRIBE Folfiri Bev* |  |  |  |  |  |  |  |  | P=0.086 |
| left | 80 | 51 |  | 63 | 40 |  | 13 | 8 |  |
| right | 38 | 68 |  | 16 | 29 |  | 2 | 4 |  |
| *FIRE-3 Folfiri Cet* |  |  |  |  |  |  |  |  | P=0.54 |
| left | 101 | 46 |  | 95 | 43 |  | 23 | 11 |  |
| right | 23 | 45 |  | 25 | 49 |  | 3 | 6 |  |
| **KRAS status** |  |  |  |  |  |  |  |  |  |
| *FIRE-3 Folfiri Bev* |  |  |  |  |  |  |  |  | P=0.69 |
| wild-type | 123 | 51 |  | 101 | 42 |  | 18 | 7 |  |
| mutant | 26 | 58 |  | 16 | 35 |  | 3 | 7 |  |
| *TRIBE Folfiri Bev* |  |  |  |  |  |  |  |  | P=0.46 |
| wild-type | 56 | 58 |  | 34 | 35 |  | 6 | 6 |  |
| mutant | 46 | 49 |  | 39 | 42 |  | 8 | 9 |  |
| *FIRE-3 Folfiri Cet* |  |  |  |  |  |  |  |  | P=0.28 |
| wild-type | 107 | 47 |  | 96 | 42 |  | 23 | 10 |  |
| mutant | 21 | 40 |  | 28 | 54 |  | 3 | 6 |  |
|  |  |  |  |  |  |  |  |  |  |
| **RAS status** |  |  |  |  |  |  |  |  |  |
| *FIRE-3 Folfiri Bev* |  |  |  |  |  |  |  |  | P=0.90 |
| wild-type | 97 | 50 |  | 82 | 42 |  | 15 | 8 |  |
| mutant | 43 | 53 |  | 32 | 40 |  | 6 | 7 |  |
| *TRIBE Folfiri Bev* |  |  |  |  |  |  |  |  | P=0.41 |
| wild-type | 33 | 60 |  | 19 | 35 |  | 3 | 5 |  |
| mutant | 58 | 50 |  | 47 | 41 |  | 11 | 9 |  |
| *FIRE-3 Folfiri Cet* |  |  |  |  |  |  |  |  | P=0.24 |
| wild-type | 80 | 45 |  | 78 | 44 |  | 20 | 11 |  |
| mutant | 38 | 43 |  | 46 | 52 |  | 5 | 6 |  |
| **BRAF status** |  |  |  |  |  |  |  |  |  |
| *FIRE-3 Folfiri Bev* |  |  |  |  |  |  |  |  | P=0.26 |
| wild-type | 133 | 53 |  | 100 | 39 |  | 20 | 8 |  |
| mutant | 10 | 40 |  | 14 | 56 |  | 1 | 4 |  |
| *TRIBE Folfiri Bev* |  |  |  |  |  |  |  |  | P=0.50 |
| wild-type | 95 | 54 |  | 68 | 38 |  | 14 | 8 |  |
| mutant | 8 | 67 |  | 4 | 33 |  | 0 | 0 |  |
| *FIRE-3 Folfiri Cet* |  |  |  |  |  |  |  |  | P=0.95 |
| wild-type | 115 | 46 |  | 114 | 45 |  | 23 | 9 |  |
| mutant | 8 | 42 |  | 9 | 47 |  | 2 | 11 |  |
